# Supplementary material for: Operations Research at Bell Laboratories through the 1970s: Part III
Source: Atypon-hosted journal article supplement (doi:10.1287/opre.48.4.517.12419), 2000-08-01
Supplement: opre.48.4.517-sm.pdf [file opre.48.4.517-sm.pdf]

Online Companion for  
“Operations Research at Bell Laboratories Through the 1970s”  
*Parts I, II, and III*

*Operations Research*  
Vol. 48, Nos. 2, 3, and 4

March-April 2000 (*Part I*)  
May-June 2000 (*Part II*)  
July-August 2000 (*Part III*)

Cree S. Dawson  
Lauren Park, North Carolina  
creedawson@aol.com

Charles J. McCallum, Jr.  
First USA Bank, N. A.  
Wilmington, Delaware  
charlesmccallum@firstusa.com

R. Bradford Murphy  
Basking Ridge, New Jersey

Eric Wolman  
George Mason University  
Fairfax, Virginia  
eric.wolman@erols.com

©2000

**informs**

# TABLE OF CONTENTS

“OPERATIONS RESEARCH AT BELL LABORATORIES THROUGH THE 1970s,”  
by DAWSON, McCALLUM, MURPHY, and WOLMAN

## Part I - March-April 2000

### ABSTRACT

#### 1. ORGANIZATIONAL HISTORY

- 1.1 Origins of Operations Research
- 1.2 Early Uses of Quantitative Methods
- 1.3 Recognition of Operations Research
- 1.4 Establishment of Business Operations Analysis  
in the Bell System
- 1.5 Operations Research at Bell Labs
- 1.6 Evolution of the Operations Research Center  
within Bell Labs

#### 2. APPLICATION OF OPERATIONS RESEARCH TO BELL SYSTEM PROBLEMS

- 2.1 Teletraffic Theory and Engineering
  - 2.1.1 Traffic Variability
  - 2.1.2 Network Management
  - 2.1.3 Research on Congestion Systems
  - 2.1.4 Traffic Network Design
  - 2.1.5 Leadership of Traffic Work

## Part II - May-June 2000

- 2.2 Capacity Expansion in Telephone Networks
- 2.3 Operations Analysis
  - 2.3.1 Coin Collection
  - 2.3.2 Inventory Management for Station Products
  - 2.3.3 Directory Marketing Analysis
  - 2.3.4 Workforce Scheduling
  - 2.3.5 Other Activities and Supporting Research

## **Part III - July-August 2000**

### 2.4 Applied Statistics

2.4.1 Forecasting

2.4.2 Measurement and Index Construction

2.4.3 Sample Surveys for Engineering  
and Cost Analysis

2.4.4 Engineering Design and Human Factors

2.4.5 Human Resources Management

2.4.6 Software for Special and General Applications

2.4.7 Applied Research in Statistics

### 2.5 Related Operations Research Activities

2.5.1 Data Management for Operations

2.5.2 Economics Modeling

2.5.3 Examples of Analytical Support  
and Corporate Planning in AT&T

## 3. SUMMARY
